# Supplementary material for: Application of Docking Analysis in the Prediction and Biological Evaluation of the Lipoxygenase Inhibitory Action of Thiazolyl Derivatives of Mycophenolic Acid
Source: MDPI journal article supplement (doi:10.3390/molecules23071621), 2018-07-03

# Display Report

## Analysis Info

Analysis Name D:\Data\Chizhov\Krayushkin\Melekhina\12\_&clb.d  
Method tune\_wide.m  
Sample Name /MVGR 12  
Comment CH3CN 100 %, dil. 2000, calibrant added

Acquisition Date 18.06.2018 15:55:04

Operator BDAL@DE  
Instrument / Ser# micrOTOF 10248

## Acquisition Parameter

|             |            |                      |          |                  |           |
|-------------|------------|----------------------|----------|------------------|-----------|
| Source Type | ESI        | Ion Polarity         | Positive | Set Nebulizer    | 0.4 Bar   |
| Focus       | Not active |                      |          | Set Dry Heater   | 180 °C    |
| Scan Begin  | 50 m/z     | Set Capillary        | 4500 V   | Set Dry Gas      | 4.0 l/min |
| Scan End    | 3000 m/z   | Set End Plate Offset | -500 V   | Set Divert Valve | Waste     |

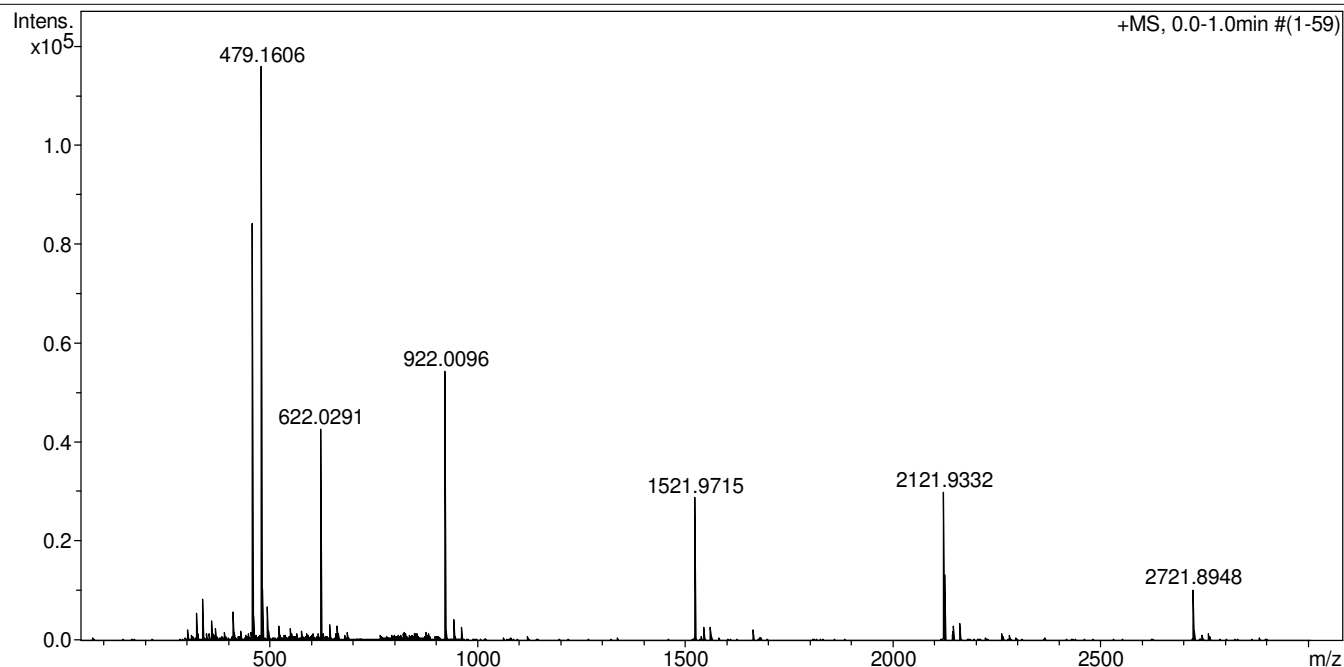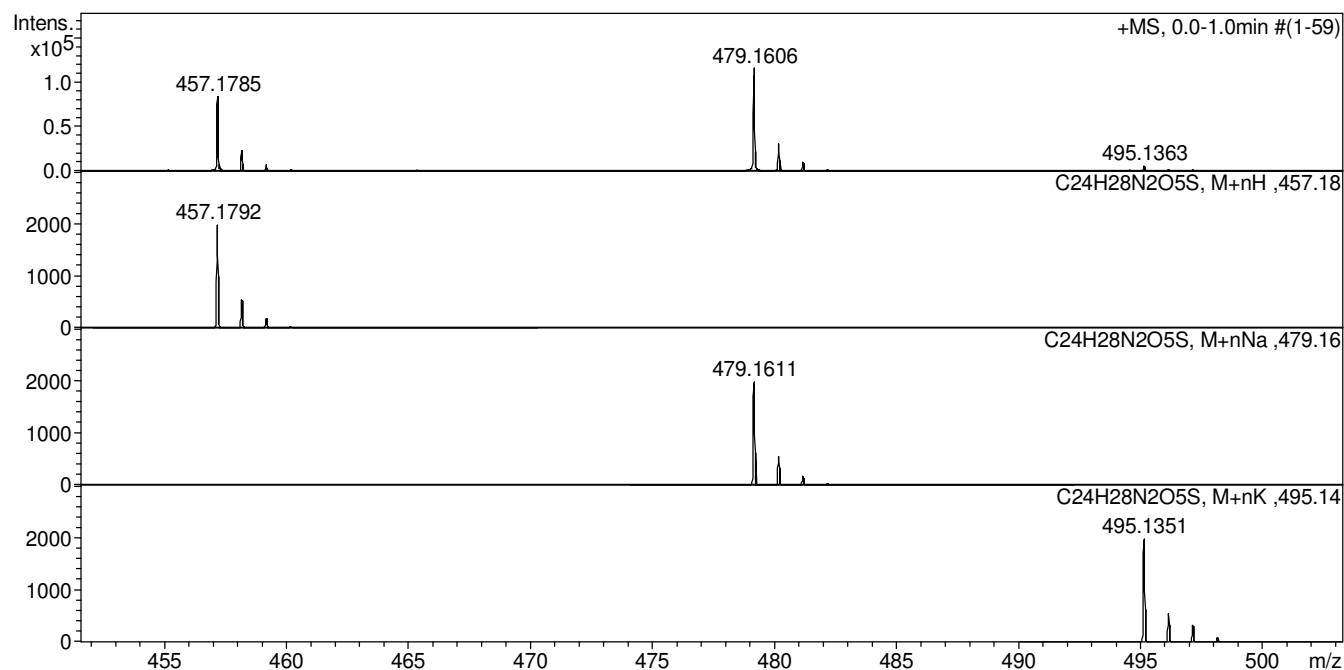

Supplement: s1 [file s1]
